# Supplementary material for: Association between Regular Aspirin Use and Circulating Markers of Inflammation: A Study within the Prostate, Lung, Colorectal, and Ovarian Cancer Screening Trial
Source: Oxford University Press journal article supplement (doi:10.1158/1055-9965.epi-14-1363), 2015-02-26
Supplement: 10559965epi141363-sup-142234_1_supp_2859619_njmj49.doc [file 10559965epi141363-sup-142234_1_supp_2859619_njmj49.doc]

**Supplementary Methods & Tables**

**Details on development of sampling weights and their use in analysis**

Our dataset consists of subjects selected from the three Prostate, Lung, Colorectal and Ovarian (PLCO) Cancer Screening Trial nested case-control studies that had already measured subsets of the marker panels (lung, ovary, non-Hodgkin lymphoma [NHL]) . We pooled the data from the three studies to allow us to include everyone with measured markers, including the cancer cases. We cannot simply pool the data and naively analyze it like one large case-control study because the three studies collect samples with differential selection probabilities across different subgroups, and therefore the three samples as a whole were non-representative of the PLCO. For example, the lung study greatly oversampled smokers, and the ovary study is all women. We did not pool by using multiple imputation, because our small sample size does not seem powerful enough to develop a reliable 78-dimensional imputation model for the 78 markers to impute for over 50,000 PLCO screening arm participants.

Instead, we handled the three studies as if they were non-representative samples from the PLCO screening arm. We used propensity score weighting methods from survey sampling to account for the selection criteria for each study . Our sampling weights allow the analysis to better reflect the PLCO screening arm. Weights were created for each study, all studies taken together, and each two-study combination, for a total of seven sets of weights. The weight used for each marker depends on what subset of studies it was measured in. Weights were created for selected cases and non-cases, and males and females separately, for each study. Study-specific weights allow a marker to have different distributions for each study due to differing population characteristics or lot-to-lot assay variation between studies.

*PROC LOGISTIC* in SAS was used to generate the single-study weights. *PROC LOGISTIC* was run on all PLCO screening arm cases and controls who would have been eligible to be selected at the time of their study, separately. The outcome modeled was whether the participant was selected for the relevant study. For the 6 participants selected for more than one study, they were only assigned a weight based on their first study. Case/control status was defined as it had been in the respective studies. Basic exclusion criteria were imposed on all subjects to arrive at the eligible cohort: subjects have baseline questionnaire, biochemical consent, white non-Hispanic, no prior history of cancer, complete smoking data.

The predictors modeled by PROC LOGISTIC were age at randomization (range of 55-74; in 5 year groups; 4 levels), detailed smoking history (7 levels), and vital status (alive/dead). We fit 12 separate logistic regression models in strata defined by case/control status, gender, and study. Using each fitted model, predicted probabilities were estimated for the selected members of the PLCO screening arm, within each stratum. The weight was then taken to be the inverse of this probability and assigned to the selected case or control. Consequently, the weights summed to exactly the total eligible PLCO screening arm, the weights for each gender exactly summed to the total number in the eligible cohort for each gender, and the weights for each cancer case (and control) exactly summed to the total numbers in the eligible cohort for each cancer site (and control). The median weights (interquartile ranges) by study were as follows: lung: 13.7 (1.65, 53.1); NHL: 72.1 (1.79, 180.6); ovary: 4.71 (1.56, 199.1).

Many of the markers were measured across studies, and for these markers we used multi-study weights. To calculate the multi-study weights, the subjects in the studies were assigned their single-study weight divided by the number of relevant studies for which they would have been eligible, based on their gender. For example, for markers measured in all three studies, all 1819 subjects with markers were used, but the study-specific weights for the men were divided by 3, and weights for the women divided by 2. This ensured that the weights added up to the total number of men and women, respectively, in the eligible PLCO screening arm. For markers measured in the NHL and ovary studies only, a male subject selected for the NHL study would have a combined NHL/ovary weight equal to his NHL weight, since he would have only been eligible for the NHL study. A selected female, however, would have a combined NHL/ovary weight equal to half of her NHL weight (if selected for NHL study) or half of her ovary weight (if selected for ovary study), since she would have been eligible for both the NHL and ovary studies.

By construction, the weights summed to exactly the total number of people, men/women, and cases/controls. To examine how well the weights represented other subgroups, we calculated the predicted number of people based on the sample for that subgroup and compared with the total number for that subgroup in the eligible PLCO screening arm. In particular, our weights summed very closely to the total number of people in each category of age, smoking and body mass index (see **Supplemental Table 4**).

The sampling weights were used in logistic regression models for each dichotomized marker regressed on smoking status and other confounders . We fit the models using survey regression analysis software in SAS version 9.2. In particular, we included age, gender, and study as confounders to provide extra control for study-specific selection factors. Simulations suggest that analyses using both weighting methods and additional regression adjustment for matching factors provides a good way to adjust for non-representative sampling in nested case-control studies .

REFERENCES

1. Purdue MP, Hofmann JN, Kemp TJ, Chaturvedi AK, Lan Q, Park JH, et al. A prospective study of 67 serum immune and inflammation markers and risk of non-Hodgkin lymphoma. Blood. 2013;122:951-7.

2. Trabert B, Pinto L, Hartge P, Kemp T, Black A, Sherman ME, et al. Pre-diagnostic serum levels of inflammation markers and risk of ovarian cancer in the Prostate, Lung, Colorectal and Ovarian Cancer (PLCO) Screening Trial. Gynecol Oncol. 2014.

3. Shiels MS, Pfeiffer RM, Hildesheim A, Engels EA, Kemp TJ, Park JH, et al. Circulating inflammation markers and prospective risk for lung cancer. J Natl Cancer Inst. 2013;105:1871-80.

4. Austin PC. An Introduction to Propensity Score Methods for Reducing the Effects of Confounding in Observational Studies. Multivariate Behav Res. 2011;46:399-424.

5. EL K, BI G. Analysis of Health Surveys. 1 ed. New York, NY: John Wiley & Sons; 1999.

6. Stoer NC, Samuelsen SO. Inverse probability weighting in nested case-control studies with additional matching--a simulation study. Stat Med. 2013;32:5328-39.

**Supplemental Table 1**. Description of three case-control studies nested within PLCO.

|  | **Lung cancer** | **NHL** | **Ovarian cancer** |
| --- | --- | --- | --- |
| **Cases (N)** | 526 | 301 | 150 |
| **Controls (N)** | 592 | 301 | 149 |
| **Included in the study (N)** | 998 | 572 | 249 |
| **Proportion of samples from the baseline visit** | 100% | 100% | 9.2% |
| **Median time from blood draw to cancer diagnosis** | 2.9 years | 8 years | 7.9 years |
| **Inclusion criteria** | Screening arm | Screening arm | Females in screening arm |
| Baseline questionnaire | Baseline questionnaire | Baseline questionnaire |
|  | Follow-up | Follow-up | Follow-up |
|  | Biochemical consent | Biochemical consent | Biochemical consent |
|  | Valid smoking history | No rare cancer | No rare cancer in controls |
|  | Prior history of cancer | Prior history of cancer | No controls with oophorectomies |
|  | Serum specimens available at baseline | Serum specimens available at baseline | 2+ years pre-diagnosis specimen available |
|  |  |  |  |
| **Matching criteria** | Age at randomization (5-year) | Age at randomization (5-year) | Age at randomization (5-year) |
| Gender | Race | Race |
|  | Year of randomization | Gender | Study year of blood draw |
|  | Smoking history | Study center | Year of blood draw |
|  | Pack-years smoked | Entry season/year | Season of blood draw |
|  | Years since quitting smoking | Time of blood draw (am/pm) | Time of blood draw (am/pm) |
| **Panels tested**1 | Cytokine panel 1a (22-plex) | Cytokine panel 1a (22-plex) | Cytokine panel 1a (22-plex) |
|  | Cytokine panel 1b (15-plex) | Cytokine panel 1b (15-plex) | Cytokine panel 1b (15-plex) |
|  | Cytokine panel 2 (17-plex) | Cytokine panel 2 (17-plex) | --- |
|  | Cytokine panel 3 (7-plex) | Cytokine panel 3 (7-plex) | --- |
|  | Cardiovascular disease (CVD) panel (3-plex) | --- | CRP only |
|  | Soluble receptor panel (13-plex) | Soluble receptor panel (13-plex) | Soluble receptor panel (13-plex) |
|  | --- | Metabolic hormone panel (9-plex) | Metabolic hormone panel (9-plex) |
| **Total number of markers** | 77 | 83 | 60 |

1See supplemental table 2 for a list of markers included in each panel.

**Supplemental Table 2.** Multiplex immune panel markers measured in the PLCO Cancer Screening Study

| **Cytokine Panel 1a** | **Cytokine Panel 1b** | **Cytokine Panel 2** | **Cytokine Panel 3** | **Metabolic Disease Panel** | **Soluble Receptor Panel** | **CVD Panel 2** |
| --- | --- | --- | --- | --- | --- | --- |
| EGF | GM-CSF | CXCL13 | CCL19 | Insulin | sCD301 | CRP |
| CCL11 | IL-10 | CCL21 | CCL20 | Leptin | sEGFR | SAA |
| FGF-basic | IL-12 (p70) | CCL27 | CXCL11 | GIP (total) | sGP130 | SAP |
| FLT-3 ligand1 | IL-15 | CXCL5 | CXCL6 | Polypeptide | sIL-1RI1 |  |
| CX3CL1 | IL-17 | CCL24 | CXCL9 | PYY (total) | sIL-4R |  |
| G-CSF | IL-1β | IL-161 | IL-11 | GLP-1 (active) | sIL-6R |  |
| CXCL1,2,3 | IL-1Ra | IL-33 | IL-29 | Amylin (total) | sIL-1RII |  |
| IFN-α2 | IL-2 | LIF1 |  | C-peptide | sRAGE1 |  |
| IFN-γ | IL-31 | CCL8 |  | Glucagon | sTNFR1 |  |
| IL-12 (p40) | IL-4 | CCL13 |  |  | sTNFR2 |  |
| IL-1α | IL-5 | CCL15 |  |  | sVEGFR11 |  |
| IL-8 | IL-6 | SCF |  |  | sVEGFR2 |  |
| CXCL10 | IL-7 | CXCL12 |  |  | sVEGFR3 |  |
| CCL2 | TGFα | CCL17 |  |  |  |  |
| CCL7 | TGFβ | TPO |  |  |  |  |
| CCL22 |  | TRAIL |  |  |  |  |
| CCL3 |  | TSLP |  |  |  |  |
| CCL4 |  |  |  |  |  |  |
| sCD40L |  |  |  |  |  |  |
| sIL-2Rα1 |  |  |  |  |  |  |
| TNFα |  |  |  |  |  |  |
| VEGF |  |  |  |  |  |  |

1 Excluded from the analysis due to poor performance (>90% below the lower limit of detection)

| **Supplemental Table 3**: Percent detection and median levels for each inflammatory marker by original study. | | | | | | | | | | | |
| --- | --- | --- | --- | --- | --- | --- | --- | --- | --- | --- | --- |
|  |  |  | |  |  |  | |  |  |  | |
|  | **Lung Study** | | |  | **NHL Study** | | |  | **Ovarian Study** | | |
| Inflammatory Markers | % Detection | | Median1 |  | % Detection | | Median1 |  | % Detection | | Median1 |
| Amylin | -- | | -- |  | 47.0 | | 13.7 |  | 70.9 | | 39.3 |
| CCL2 | 99.9 | | 454.6 |  | 100.0 | | 275.1 |  | 99.7 | | 305.4 |
| CCL3 | 6.0 | | --2 |  | 28.9 | | --2 |  | 15.1 | | --2 |
| CCL4 | 84.5 | | 37.3 |  | 90.4 | | 24.2 |  | 73.9 | | 23.9 |
| CCL7 | 16.4 | | --2 |  | 13.5 | | --2 |  | 12.4 | | --2 |
| CCL8 | 97.5 | | 48.6 |  | 95.0 | | 40.4 |  | -- | | -- |
| CCL11 | 99.6 | | 104.6 |  | 99.8 | | 69.8 |  | 99.3 | | 69.4 |
| CCL13 | 90.1 | | 101.9 |  | 95.0 | | 98.3 |  | -- | | -- |
| CCL15 | 100.0 | | 1962.2 |  | 100.0 | | 1533.6 |  | -- | | -- |
| CCL17 | 100.0 | | 118.9 |  | 100.0 | | 82.5 |  | -- | | -- |
| CCL19 | 100.0 | | 51.3 |  | 99.8 | | 59.7 |  | -- | | -- |
| CCL20 | 70.9 | | 4.1 |  | 62.5 | | 3.6 |  | -- | | -- |
| CCL21 | 94.0 | | 305.1 |  | 86.7 | | 252.4 |  | -- | | -- |
| CCL22 | 99.9 | | 1164.2 |  | 100.0 | | 771.8 |  | 99.7 | | 843.7 |
| CCL24 | 100.0 | | 110.7 |  | 100.0 | | 825.1 |  | -- | | -- |
| CCL27 | 100.0 | | 760.5 |  | 100.0 | | 635.2 |  | -- | | -- |
| C-peptide | -- | | -- |  | 99.5 | | 1837.4 |  | 99.7 | | 2465.9 |
| CRP | 100.0 | | 4973100.0 |  | -- | | -- |  | 100 | | 10457000.0 |
| CX3CL1 | 24.3 | | --2 |  | 8.0 | | --2 |  | 8.4 | | --2 |
| CXCL1,2,3 | 99.9 | | 852.5 |  | 100.0 | | 416.2 |  | 99.7 | | 521.8 |
| CXCL5 | 100.0 | | 867.0 |  | 100.0 | | 621.3 |  | -- | | -- |
| CXCL6 | 100.0 | | 56.3 |  | 99.8 | | 58.6 |  | -- | | -- |
| CXCL9 | 100.0 | | 533.5 |  | 99.8 | | 478.4 |  | -- | | -- |
| CXCL10 | 100.0 | | 311.1 |  | 100.0 | | 219.6 |  | 100 | | 301.1 |
| CXCL11 | 99.8 | | 29.2 |  | 99.8 | | 30.1 |  | -- | | -- |
| CXCL12 | 100.0 | | 2763.2 |  | 100.0 | | 3301.8 |  | -- | | -- |
| CXCL13 | 100.0 | | 19.1 |  | 100.0 | | 16.9 |  | -- | | -- |
| EGF | 81.0 | | 83.5 |  | 86.0 | | 36.2 |  | 78.9 | | 43.1 |
| FGF-2 | 37.5 | | --2 |  | 25.6 | | --2 |  | 22.1 | | --2 |
| G-CSF | 52.0 | | 16.6 |  | 36.4 | | --2 |  | 43.8 | | --2 |
| GIP | -- | | -- |  | 99.3 | | 22.3 |  | 99.3 | | 48.7 |
| GLP-1 | -- | | -- |  | 20.6 | | --2 |  | 35.5 | | --2 |
| Glucagon | -- | | -- |  | 19.9 | | --2 |  | 21.7 | | --2 |
| GM-CSF | 29.2 | | --2 |  | 40.4 | | --2 |  | 40.5 | | --2 |
| IFN-α2 | 10.5 | | --2 |  | 17.3 | | --2 |  | 14.7 | | --2 |
| IFN-γ | 52.3 | | 1.1 |  | 40.5 | | --2 |  | 21.1 | | --2 |
| IL-1α | 15.9 | | --2 |  | 20.6 | | --2 |  | 18.4 | | --2 |
| IL-1β | 20.6 | | --2 |  | 32.1 | | --2 |  | 25.8 | | --2 |
| IL-1RA | 17.1 | | --2 |  | 27.9 | | --2 |  | 25.4 | | --2 |
| IL-2 | 18.3 | | --2 |  | 30.2 | | --2 |  | 22.4 | | --2 |
| IL-4 | 21.1 | | --2 |  | 25.1 | | --2 |  | 29.8 | | --2 |
| IL-5 | 11.9 | | --2 |  | 16.9 | | --2 |  | 14.7 | | --2 |
| IL-6 | 26.1 | | --2 |  | 33.4 | | --2 |  | 30.1 | | --2 |
| IL-7 | 18.1 | | --2 |  | 21.6 | | --2 |  | 52.5 | | 1.0 |
| IL-8 | 98.9 | | 10.3 |  | 97.7 | | 5.3 |  | 91.3 | | 4.3 |
| IL-10 | 21.1 | | --2 |  | 32.1 | | --2 |  | 27.8 | | --2 |
| IL-11 | 26.4 | | --2 |  | 22.9 | | --2 |  | -- | | -- |
| IL-12 (p40) | 12.4 | | --2 |  | 25.4 | | --2 |  | 23.4 | | --2 |
| IL-12 (p70) | 16.2 | | --2 |  | 18.1 | | --2 |  | 12 | | --2 |
| IL-15 | 14.5 | | --2 |  | 22.8 | | --2 |  | 18.4 | | --2 |
| IL-16 | 45.2 | | --2 |  | 86.2 | | 26.5 |  | -- | | -- |
| IL-17 | 47.9 | | --2 |  | 55.6 | | 0.9 |  | 54.9 | | 0.9 |
| IL-29 | 18.4 | | --2 |  | 11.1 | | --2 |  | -- | | -- |
| IL-33 | 22.2 | | --2 |  | 21.4 | | --2 |  | -- | | -- |
| Insulin | -- | | -- |  | 95.2 | | 451.7 |  | 96 | | 614.7 |
| Leptin | -- | | -- |  | 99.8 | | 8176.1 |  | 100 | | 19587.6 |
| PP | -- | | -- |  | 95.2 | | 102.1 |  | 96 | | 136.4 |
| PYY | -- | | -- |  | 21.6 | | --2 |  | 39.8 | | --2 |
| SAA | 99.7 | | 3708250.0 |  | -- | | -- |  | -- | | -- |
| SAP | 100.0 | | 34361000.0 |  | -- | | -- |  | -- | | -- |
| sCD40L | 99.6 | | 10000 |  | 99.7 | | 10000.0 |  | -- | | -- |
| SCF | 52.8 | | 4.47 |  | 35.7 | | --2 |  | -- | | -- |
| sEGFR | 100.0 | | 45088.8 |  | 100.0 | | 49006.1 |  | 100 | | 50086.7 |
| sGP130 | 100.0 | | 152522.3 |  | 100.0 | | 159111.2 |  | 100 | | 168900.2 |
| sIL-1RII | 99.9 | | 5024.93 |  | 99.7 | | 5034.0 |  | 99.7 | | 5553.6 |
| sIL-4R | 99.9 | | 950.43 |  | 100.0 | | 1035.1 |  | 100 | | 1054.3 |
| sIL-6R | 100.0 | | 15156.91 |  | 100.0 | | 15556.4 |  | 100 | | 17229.2 |
| sTNFR1 | 100.0 | | 981.27 |  | 99.8 | | 1081.6 |  | 100 | | 1274.8 |
| sTNFR2 | 100.0 | | 4891.25 |  | 100.0 | | 5147.8 |  | 100 | | 5450.2 |
| sVEGFR2 | 100.0 | | 11872.25 |  | 100.0 | | 11753.4 |  | 100 | | 12096.8 |
| sVEGFR3 | 82.3 | | 1275.05 |  | 83.6 | | 1230.6 |  | 76.3 | | 1179.3 |
| TGF-α | 78.5 | | 1.81 |  | 81.9 | | 1.8 |  | 84.3 | | 1.8 |
| TNF-α | 99.5 | | 6.31 |  | 99.2 | | 5.3 |  | 99 | | 5.7 |
| TNF-β | 21.2 | | --2 |  | 30.9 | | --2 |  | 24.8 | | --2 |
| TPO | 27.6 | | --2 |  | 53.5 | | 22.1 |  | -- | | -- |
| TRAIL | 96.6 | | 25.37 |  | 99.5 | | 33.4 |  | -- | | -- |
| TSLP | 23.9 | | --2 |  | 16.1 | | --2 |  | -- | | -- |
| VEGF | 74.4 | | 132.29 |  | 52.2 | | 40.0 |  | 45.8 | | --2 |
|  |  | |  |  |  | |  |  |  | |  |
| Abbreviations: EGF, epidermal growth factor; VEGF, vascular endothelial growth factor; FGF-2, basic fibroblast growth factor; CCL, chemokine C-C motif ligand; CXCL, chemokine C-X-C motif ligand; IL, interleukin; R, receptor; sVEGFR, soluble vascular endothelial growth factor receptor; sTNFR, soluble tumor necrosis factor receptor; PP, pancreatic polypeptide; sIL-R, soluble interleukin receptor; TRAIL, TNF-related apoptosis-inducing ligand; GIP, gastric inhibitory polypeptide; GM-CSF, granulocyte-macrophage colony-stimulating factor; sEGFR, soluble epidermal growth factor receptor; IFN, interferon; G-CSF, granulocyte colony-stimulating factor; TSLP, thymic stromal lymphopoietin; TPO, thrombopoietin; sGP130, soluble gp130; sCD40L, soluble CD40 ligand; SAP, serum amyloid P; TGF, transforming growth factor; PYY, peptide YY; SCF, stem cell factor; SAA, serum amyloid A; GLP, glucagon-like peptide | | | | | | | | | | | |
| 1Units in pg/mL  2Median was less than the LLOD | | | | | | | | | | | |

**Supplemental Table 4**: Participant characteristics for i) the 1,819 individuals with inflammatory marker data, ii) the weighted population and iii) those in the PLCO screening arm that met the study eligibility criteria.

|  | N, % | Weighted, N (%) | PLCO Screening Arm, N (%) |
| --- | --- | --- | --- |
| Total | 1,819 | 58,264 | 58,264 |
|  |  |  |  |
| Gender |  |  |  |
| Female | 814 (44.8) | 28,331 (48.6) | 28,331 (48.6) |
| Male | 1,005 (55.3) | 29,933 (51.4) | 29,933 (51.4) |
|  |  |  |  |
| Age group |  |  |  |
| ≤59 | 335 (18.4) | 16,329 (28.0) | 20,056 (34.4) |
| 60-64 | 544 (29.9) | 20,500 (35.2) | 17,954 (30.8) |
| 65-69 | 546 (30.0) | 11,945 (20.5) | 12,877 (22.1) |
| ≥70 | 394 (21.7) | 9,490 (16.3) | 7,377 (12.7) |
|  |  |  |  |
| BMI category |  |  |  |
| <25 | 639 (35.1) | 18,009 (30.1) | 18,914 (32.4) |
| 25-30 | 792 (43.5) | 26,939 (46.2) | 24,753 (42.5) |
| ≥30 | 367 (20.2) | 12,473 (21.4) | 14,015 (24.1) |
| Missing | 21 (1.2) | 843 (1.4) | 582 (1.0) |
|  |  |  |  |
| Smoking status |  |  |  |
| Never | 548 (30.1) | 27,219 (46.7) | 27,389 (47.0) |
| Current | 414 (22.8) | 5,664 (9.7) | 5,843 (10.0) |
| Former | 857 (47.1) | 25,381 (43.6) | 25,032 (43.0) |
|  |  |  |  |
| Frequency of Aspirin Use |  |  |  |
| Not taken regularly (<4 tablets per month) | 1,036 (57.0) | 34,760 (59.7) | 34,631 (59.4) |
| Low Use (1-4 tablets per week) | 247 (13.6) | 7,591 (13.0) | 7,792 (13.4) |
| Moderate Use (1 tablet per day) | 431 (23.7) | 12,384 (21.3) | 12,635 (21.7) |
| High Use (2 or more tablets per day) | 105 (5.8) | 3,529 (6.1) | 3,190 (5.5) |
|  |  |  |  |
| Frequency of Ibuprofen Use |  |  |  |
| Not taken regularly (<4 tablets per month) | 1,471 (80.9) | 44,832 (76.9) | 46,785 (80.3) |
| Low Use (1-4 tablets per week) | 150 (8.3) | 6,227 (10.7) | 5,683 (9.8) |
| Moderate Use (1 tablet per day) | 57 (3.1) | 3,084 (5.3) | 1,435 (2.5) |
| High Use (2 or more tablets per day) | 141 (7.8) | 4,121 (7.1) | 4,345 (7.5) |
|  |  |  |  |
| Original case-control study |  |  |  |
| Lung cancer study | 998 (54.9) | 24,410 (41.9) | --- |
| NHL study | 572 (31.5) | 24,410 (41.9) | --- |
| Ovarian cancer study | 249 (13.7) | 9,444 (16.2) | --- |
|  |  |  |  |
| Case-control Status1 |  |  |  |
| Case | 877 (48.2) | 1,637 (2.8) | --- |
| Control | 942 (51.8) | 57,563 (98.8) | --- |
|  |  |  |  |
| 1Cases were individuals without cancer at the time of blood collection, but who developed either lung, NHL or ovarian cancer over the course of follow-up. Controls were free of the cancer of interest of each study at the time of selection. | | | |

| **Supplemental Table 5**: Associations between regular aspirin use and circulating inflammatory markers2, restricted to individuals without a history of chronic heart disease, stroke or arthritis. | | | | | | | |
| --- | --- | --- | --- | --- | --- | --- | --- |
|  |  |  | |  | |  |  |
|  |  | **Regular Aspirin Use** | | | | |  |
|  | **No Regular Use** (< 4 tablets/month) N=609 | **Low**  (1-4 tablets/week) N=153 | **Moderate** (1 tablet/day) N=162 | | **High** (2+ tablets/day) N=31 | | **P for Trend** |
| Inflammatory Factors |  | **OR1 (95% CI)** | **OR1 (95% CI)** | | **OR1 (95% CI)** | |  |
| CCL15 | ref | 0.8 (0.4-1.8) | 0.5 (0.3-0.9) | | 0.5 (0.1-2.3) | | 0.04 |
| sVEGFR2 | ref | 1.0 (0.5-1.9) | 0.5 (0.3-0.9) | | 0.3 (0.1-1.1) | | 0.01 |
| sTNFR1 | ref | 1.1 (0.6-2.0) | 0.5 (0.3-0.9) | | 0.4 (0.1-1.6) | | 0.03 |
| IL-4 | ref | 1.4 (0.7-2.8) | 1.4 (0.6-2.9) | | 5.9 (1.6-21.4) | | 0.03 |
| CCL13 | ref | 1.2 (0.6-2.6) | 1.7 (0.9-3.3) | | 4.9 (1.1-21.3) | | 0.02 |
| CCL17 | ref | 0.9 (0.4-1.8) | 1.1 (0.5-2.4) | | 1.9 (0.4-9.8) | | 0.54 |
|  | | | | | | | |
| Abbreviations: CCL, chemokine C-C motif ligand; VEGFR2, soluble vascular endothelial growth factor receptor 2; sTNFR1, soluble tumor necrosis factor receptor 1; IL-4, interleukin 4; OR, adjusted odds ratio; CI, confidence interval | | | | | | | |
|  | | | | | | | |
| 1ORs were adjusted for age, gender, ibuprofen use, smoking, history of arthritis, history of coronary heart disease or heart attack, history of stroke, body mass index, case-control study of origin, and year of serum collection  2Marker levels were dichotomized at the median or as detectable/undetectable. | | | | | | | |

| **Supplemental Table 6**: Associations between regular aspirin use and circulating inflammatory markers2, by study. | | | | | | | |
| --- | --- | --- | --- | --- | --- | --- | --- |
|  |  |  | **Regular Aspirin Use** | | |  |  |
| **Study** | **Inflammatory Marker** | **No Regular Use** (< 4 tablets/month) | **Low**  (1-4 tablets/week) | **Moderate** (1 tablet/day) | **High** (2+ tablets/day) | **P for trend** | **P for heterogeneity** |
|  |  |  | **OR1 (95% CI)** | **OR1 (95% CI)** | **OR1 (95% CI)** |  |  |
| Lung | CCL15 | ref | 1.0 (0.5-2.0) | 0.4 (0.2-0.9) | 0.6 (0.2-1.6) | 0.04 |  |
| NHL | CCL15 | ref | 0.4 (0.2-1.0) | 0.6 (0.3-1.2) | 0.3 (0.1-1.1) | 0.02 |  |
| Ovary | CCL15 | ref | -- | -- | -- | -- | 0.70 |
|  |  |  |  |  |  |  |  |
| Lung | sVEGFR2 | ref | 1.9 (0.9-4.1) | 0.6 (0.3-1.3) | 0.4 (0.1-1.5) | 0.2 |  |
| NHL | sVEGFR2 | ref | 0.4 (0.2-0.9) | 0.6 (0.3-1.3) | 0.3 (0.1-0.9) | 0.02 |  |
| Ovary | sVEGFR2 | ref | 0.8 (0.3-2.3) | 0.7 (0.2-2.1) | 2.2 (0.1-69.1) | 0.7 | 0.65 |
|  |  |  |  |  |  |  |  |
| Lung | sTNFR1 | ref | 0.7 (0.3-1.5) | 0.8 (0.4-1.6) | 0.4 (0.1-1.5) | 0.1 |  |
| NHL | sTNFR1 | ref | 0.8 (0.3-1.7) | 0.3 (0.2-0.7) | 0.6 (0.2-1.8) | 0.01 |  |
| Ovary | sTNFR1 | ref | 2.4 (0.8-7.1) | 1.3 (0.4-4.2) | 1.7 (0.1-19.9) | 0.4 | 0.65 |
|  |  |  |  |  |  |  |  |
| Lung | IL-4 | ref | 1.4 (0.5-3.8) | 3.1 (1.3-7.1) | 2.4 (0.7-8.8) | 0.01 |  |
| NHL | IL-4 | ref | 1.6 (0.7-4.1) | 1.0 (0.4-2.1) | 3.3 (0.97-11.0) | 0.2 |  |
| Ovary | IL-4 | ref | 1.0 (0.3-3.5) | 1.3 (0.3-4.8) | 2.7 (0.2-44.3) | 0.6 | 0.56 |
|  |  |  |  |  |  |  |  |
| Lung | CCL13 | ref | 1.3 (0.6-3.2) | 1.0 (0.5-2.1) | 1.4 (0.5-3.8) | 0.6 |  |
| NHL | CCL13 | ref | 1.3 (0.6-2.8) | 1.5 (0.7-2.9) | 4.5 (1.2-17.6) | 0.03 |  |
| Ovary | CCL13 | ref | -- | -- | -- | -- | 0.22 |
|  |  |  |  |  |  |  |  |
| Lung | CCL17 | ref | 2.1 (0.95-4.4) | 1.2 (0.5-2.5) | 4.2 (1.2-15.6) | 0.04 |  |
| NHL | CCL17 | ref | 0.6 (0.3-1.4) | 1.1 (0.5-2.4) | 2.1 (0.6-7.2) | 0.4 |  |
| Ovary | CCL17 | ref | -- | -- | -- | -- | 0.37 |
|  |  |  |  |  |  |  |  |
| Abbreviations: CCL, chemokine C-C motif ligand; VEGFR2, soluble vascular endothelial growth factor receptor 2; sTNFR1, soluble tumor necrosis factor receptor 1; IL-4, interleukin 4; OR, odds ratio; CI, confidence interval | | | | | | | |
|  | | | | | | | |
| 1ORs were adjusted for age, gender, ibuprofen use, smoking, history of arthritis, history of coronary heart disease or heart attack, history of stroke, body mass index, case-control study of origin, and year of serum collection  2Marker levels were dichotomized at the median or as detectable/undetectable. | | | | | | | |

| **Supplemental Table 7**: Associations between regular aspirin use and circulating inflammatory markers2. | | | | | | |
| --- | --- | --- | --- | --- | --- | --- |
|  | |  | **Regular Aspirin Use** | | |  |
| Inflammatory Factors | | **No Regular Use** (< 4 tablets/month) N=1036 | **Low**  (1-4 tablets/week) N=247 | **Moderate** (1 tablet/day) N=431 | **High** (2+ tablets/day) N=105 | **P for Trend** |
|  | | | **OR1 (95% CI)** | **OR1 (95% CI)** | **OR1 (95% CI)** |  |
| CCL15 | ref | | 0.7 (0.4-1.2) | 0.5 (0.3-0.8) | 0.4 (0.2-0.97) | 0.002 |
| sVEGFR2 | ref | | 0.8 (0.5-1.4) | 0.7 (0.4-1.0) | 0.4 (0.2-0.96) | 0.01 |
| sTNFR1 | ref | | 0.9 (0.6-1.5) | 0.6 (0.4-0.9) | 0.5 (0.2-1.1) | 0.01 |
| IL-4 | ref | | 1.5 (0.8-2.5) | 1.6 (0.9-2.8) | 2.3 (0.9-5.7) | 0.02 |
| CCL13 | ref | | 1.3 (0.8-2.3) | 1.3 (0.8-2.1) | 2.5 (1.0-6.3) | 0.03 |
| CCL17 | ref | | 1.1 (0.6-1.9) | 1.1 (0.7-1.9) | 3.3 (1.4-8.0) | 0.04 |
| CCL8 | ref | | 1.1 (0.6-1.8) | 0.7 (0.4-1.1) | 0.5 (0.2-1.2) | 0.06 |
| PP | ref | | 1.2 (0.6-2.3) | 0.7 (0.4-1.4) | 0.3 (0.1-0.9) | 0.06 |
| sIL-1RII | ref | | 0.8 (0.5-1.3) | 0.9 (0.6-1.4) | 0.4 (0.2-1.0) | 0.09 |
| TRAIL | ref | | 0.8 (0.4-1.3) | 0.7 (0.4-1.2) | 0.6 (0.2-1.4) | 0.09 |
| GIP | ref | | 0.7 (0.4-1.3) | 1.9 (1.1-3.5) | 1.4 (0.4-4.5) | 0.12 |
| CCL7 | ref | | 1.1 (0.6-2.2) | 1.1 (0.6-2.1) | 3.0 (1.1-8.2) | 0.12 |
| CXCL11 | ref | | 1.8 (1.0-3.1) | 1.3 (0.8-2.1) | 1.7 (0.7-4.2) | 0.13 |
| GM-CSF | ref | | 0.8 (0.5-1.2) | 0.6 (0.4-0.9) | 0.8 (0.3-2.4) | 0.13 |
| VEGF | ref | | 1.1 (0.7-1.7) | 1.3 (0.8-2.0) | 1.6 (0.7-3.6) | 0.13 |
| IL-16 | ref | | 0.7 (0.4-1.2) | 0.8 (0.5-1.3) | 0.6 (0.2-1.5) | 0.14 |
| CCL27 | ref | | 0.9 (0.5-1.6) | 0.9 (0.5-1.5) | 3.4 (1.3-8.7) | 0.15 |
| sEGFR | ref | | 1.0 (0.6-1.6) | 1.0 (0.6-1.6) | 0.4 (0.2-0.9) | 0.16 |
| IFN-γ | ref | | 0.8 (0.5-1.4) | 1.1 (0.7-1.8) | 2.2 (0.96-5.0) | 0.17 |
| CXCL6 | ref | | 1.4 (0.8-2.4) | 1.1 (0.6-1.8) | 0.3 (0.1-0.8) | 0.18 |
| IL-5 | ref | | 1.1 (0.7-2.0) | 0.8 (0.4-1.4) | 1.7 (0.6-5.2) | 0.18 |
| FGF-2 | ref | | 0.8 (0.5-1.4) | 1.0 (0.6-1.7) | 2.6 (1.1-6.5) | 0.19 |
| CXCL12 | ref | | 1.1 (0.7-2.0) | 1.1 (0.6-1.7) | 2.1 (0.8-5.3) | 0.20 |
| Glucagon | ref | | 0.9 (0.4-2.1) | 1.6 (0.8-3.1) | 1.6 (0.4-5.8) | 0.21 |
| CCL21 | ref | | 0.6 (0.4-1.1) | 0.7 (0.4-1.2) | 0.8 (0.3-2.0) | 0.22 |
| G-CSF | ref | | 0.8 (0.5-1.4) | 1.0 (0.6-1.5) | 2.6 (1.0-6.4) | 0.24 |
| IL-1RA | ref | | 0.8 (0.5-1.4) | 0.6 (0.3-1.0) | 1.0 (0.4-2.5) | 0.24 |
| TSLP | ref | | 0.7 (0.3-1.3) | 0.7 (0.4-1.3) | 0.7 (0.2-2.5) | 0.26 |
| sTNFR2 | ref | | 1.0 (0.6-1.7) | 0.9 (0.5-1.4) | 0.6 (0.2-1.4) | 0.27 |
| IL-1α | ref | | 0.8 (0.4-1.4) | 1.0 (0.6-1.8) | 2.2 (0.9-5.3) | 0.29 |
| TPO | ref | | 1.0 (0.5-1.9) | 0.8 (0.5-1.4) | 0.6 (0.2-2.1) | 0.30 |
| CCL24 | ref | | 0.9 (0.5-1.7) | 0.6 (0.4-1.0) | 1.0 (0.4-2.7) | 0.31 |
| CCL4 | ref | | 1.0 (0.6-1.7) | 0.7 (0.5-1.1) | 0.9 (0.4-2.2) | 0.34 |
| CCL2 | ref | | 2.4 (1.5-3.8) | 1.1 (0.7-1.8) | 1.2 (0.5-2.6) | 0.35 |
| EGF | ref | | 1.7 (1.0-2.7) | 0.8 (0.5-1.3) | 0.6 (0.2-1.5) | 0.35 |
| IFN-α2 | ref | | 0.5 (0.3-1.1) | 0.9 (0.5-1.7) | 2.9 (0.96-8.6) | 0.35 |
| CCL3 | ref | | 0.6 (0.3-1.3) | 0.7 (0.4-1.3) | 0.9 (0.3-3.0) | 0.38 |
| Insulin | ref | | 1.3 (0.7-2.5) | 1.6 (0.9-2.9) | 0.8 (0.3-2.6) | 0.39 |
| CCL20 | ref | | 1.1 (0.6-1.8) | 0.9 (0.6-1.6) | 0.6 (0.2-1.6) | 0.39 |
| CXCL1,2,3 | ref | | 2.3 (1.4-3.7) | 1.5 (0.9-2.4) | 0.7 (0.3-1.9) | 0.40 |
| IL-7 | ref | | 1.3 (0.7-2.1) | 1.1 (0.6-2.0) | 0.3 (0.1-0.9) | 0.41 |
| CXCL9 | ref | | 1.1 (0.6-1.9) | 1.1 (0.6-1.8) | 1.5 (0.6-4.0) | 0.42 |
| Leptin | ref | | 0.8 (0.4-2.0) | 1.6 (0.8-3.1) | 1.2 (0.4-3.6) | 0.43 |
| IL-29 | ref | | 1.0 (0.4-2.3) | 1.0 (0.5-2.1) | 1.9 (0.7-5.3) | 0.44 |
| IL-33 | ref | | 0.7 (0.4-1.3) | 0.8 (0.4-1.4) | 0.8 (0.3-2.5) | 0.45 |
| TNF-α | ref | | 1.0 (0.6-1.6) | 0.7 (0.5-1.2) | 1.0 (0.4-2.3) | 0.46 |
| CRP | ref | | 1.4 (0.8-2.7) | 1.5 (0.8-3.0) | 0.8 (0.3-2.4) | 0.50 |
| C-peptide | ref | | 1.2 (0.6-2.3) | 1.0 (0.6-1.9) | 0.5 (0.2-1.7) | 0.60 |
| sGP130 | ref | | 1.4 (0.9-2.2) | 1.3 (0.8-2.0) | 0.9 (0.3-2.3) | 0.60 |
| IL-17 | ref | | 0.9 (0.5-1.4) | 1.1 (0.7-1.7) | 1.2 (0.5-2.9) | 0.64 |
| sCD40L | ref | | 1.3 (0.7-2.2) | 0.7 (0.4-1.3) | 1.1 (0.4-3.5) | 0.65 |
| CXCL10 | ref | | 1.2 (0.8-2.0) | 1.0 (0.6-1.6) | 0.8 (0.3-1.9) | 0.65 |
| sIL-6R | ref | | 1.4 (0.8-2.2) | 1.1 (0.7-1.8) | 0.9 (0.4-1.9) | 0.73 |
| IL-15 | ref | | 1.1 (0.7-2.0) | 0.8 (0.4-1.4) | 1.7 (0.6-5.2) | 0.74 |
| IL-11 | ref | | 0.7 (0.4-1.4) | 0.6 (0.3-1.0) | 1.6 (0.6-4.1) | 0.75 |
| CCL11 | ref | | 1.3 (0.8-2.2) | 0.9 (0.5-1.4) | 0.9 (0.4-2.4) | 0.75 |
| IL-10 | ref | | 0.9 (0.6-1.6) | 0.8 (0.5-1.3) | 1.2 (0.5-2.8) | 0.76 |
| IL-12 (p40) | ref | | 0.7 (0.4-1.2) | 0.9 (0.5-1.6) | 1.6 (0.6-4.2) | 0.77 |
| CX3CL1 | ref | | 0.6 (0.3-1.3) | 0.9 (0.5-1.6) | 1.7 (0.6-5.4) | 0.78 |
| SAP | ref | | 0.9 (0.4-2.0) | 0.9 (0.4-2.0) | 1.4 (0.4-5.3) | 0.78 |
| TGF-α | ref | | 1.4 (0.9-2.2) | 0.9 (0.6-1.5) | 1.2 (0.5-3.2) | 0.79 |
| CCL22 | ref | | 1.0 (0.6-1.7) | 1.0 (0.6-1.7) | 1.1 (0.4-3.0) | 0.80 |
| sIL-4R | ref | | 0.9 (0.6-1.4) | 1.0 (0.7-1.7) | 1.1 (0.4-2.8) | 0.84 |
| IL-12 (p70) | ref | | 0.7 (0.4-1.4) | 1.2 (0.6-2.3) | 1.0 (0.4-2.5) | 0.85 |
| TNF-β | ref | | 1.0 (0.6-1.6) | 0.7 (0.4-1.2) | 1.9 (0.7-5.0) | 0.85 |
| IL-8 | ref | | 1.2 (0.7-1.8) | 1.1 (0.7-1.7) | 0.9 (0.4-2.3) | 0.86 |
| Amylin | ref | | 0.8 (0.4-1.4) | 1.1 (0.6-2.1) | 1.0 (0.3-3.1) | 0.87 |
| PYY | ref | | 1.3 (0.7-2.4) | 1.2 (0.7-2.4) | 0.4 (0.1-1.5) | 0.87 |
| IL-2 | ref | | 1.0 (0.4-2.3) | 1.0 (0.5-2.1) | 1.9 (0.7-5.3) | 0.90 |
| CCL19 | ref | | 1.1 (0.6-1.9) | 1.1 (0.6-1.8) | 1.5 (0.6-4.0) | 0.92 |
| IL-1β | ref | | 0.8 (0.5-1.4) | 0.7 (0.4-1.1) | 1.7 (0.6-4.6) | 0.93 |
| sVEGFR3 | ref | | 1.0 (0.6-1.6) | 0.9 (0.6-1.4) | 1.1 (0.4-2.8) | 0.93 |
| IL-6 | ref | | 0.8 (0.5-1.3) | 0.8 (0.5-1.3) | 1.7 (0.7-4.1) | 0.93 |
| SCF | ref | | 0.9 (0.5-1.7) | 0.9 (0.5-1.5) | 1.2 (0.6-2.5) | 0.94 |
| SAA | ref | | 1.8 (0.9-3.9) | 0.4 (0.2-0.8) | 2.9 (0.9-9.1) | 0.95 |
| GLP-1 | ref | | 1.1 (0.5-2.2) | 1.4 (0.7-2.6) | 0.3 (0.1-1.7) | 0.95 |
| CXCL5 | ref | | 1.3 (0.8-2.4) | 1.0 (0.6-1.8) | 0.9 (0.4-2.1) | 0.97 |
| CXCL13 | ref | | 1.4 (0.8-2.4) | 0.8 (0.5-1.4) | 1.2 (0.4-3.4) | 0.99 |
|  |  | |  |  |  |  |
| Abbreviations: EGF, epidermal growth factor; VEGF, vascular endothelial growth factor; FGF-2, basic fibroblast growth factor; CCL, chemokine C-C motif ligand; CXCL, chemokine C-X-C motif ligand; IL, interleukin; R, receptor; sVEGFR, soluble vascular endothelial growth factor receptor; sTNFR, soluble tumor necrosis factor receptor; PP, pancreatic polypeptide; sIL-R, soluble interleukin receptor; TRAIL, TNF-related apoptosis-inducing ligand; GIP, gastric inhibitory polypeptide; GM-CSF, granulocyte-macrophage colony-stimulating factor; sEGFR, soluble epidermal growth factor receptor; IFN, interferon; G-CSF, granulocyte colony-stimulating factor; TSLP, thymic stromal lymphopoietin; TPO, thrombopoietin; sGP130, soluble gp130; sCD40L, soluble CD40 ligand; SAP, serum amyloid P; TGF, transforming growth factor; PYY, peptide YY; SCF, stem cell factor; SAA, serum amyloid A; GLP, glucagon-like peptide; OR, odds ratio; CI, confidence interval | | | | | | |
|  | | | | | | |
| 1ORs were adjusted for age, gender, ibuprofen use, smoking, history of arthritis, history of coronary heart disease or heart attack, history of stroke, body mass index, case-control study of origin, and year of serum collection  2Marker levels were dichotomized at the median or as detectable/undetectable. | | | | | | |
